# Supplementary material for: Landscape genomic prediction for restoration of a Eucalyptus foundation species under climate change
Source: eLife journal article supplement (doi:10.7554/elife.31835), 2018-04-23
Supplement: supp [file elife-31835-supp-v1.zip]

Archive with 13 entries (13 files):
- elife_poa_e31835_Supplementary_file_6.csv
- elife_poa_e31835_Supplementary_file_3.csv
- elife_poa_e31835_Supplementary_file_8.csv
- elife_poa_e31835_Supplementary_file_1.csv
- elife_poa_e31835_Figure_1_figure_supplement_4.pdf
- elife_poa_e31835_Figure_1_figure_supplement_2.pdf
- elife_poa_e31835_Supplementary_file_4.csv
- elife_poa_e31835_Supplementary_file_5.csv
- elife_poa_e31835_Figure_1_figure_supplement_3.pdf
- elife_poa_e31835_Supplementary_file_2.csv
- elife_poa_e31835_Supplementary_file_7.csv
- elife_poa_e31835_Transparent_Reporting_File.pdf
- elife_poa_e31835_Figure_1_figure_supplement_1.pdf
