# Supplementary material for: Landscape genomic prediction for restoration of a Eucalyptus foundation species under climate change
Source: eLife journal article supplement (doi:10.7554/elife.31835), 2018-04-23
Supplement: supp [file elife-31835-supp-v1.zip › elife_poa_e31835_Figure_1_figure_supplement_2.pdf]

PCoA axis 2 ( 5.6 %)

150  
100  
50  
0

0

50

100

150

200

PCoA axis 1 ( 21.6 %)

26-7  
26-6  
28-4  
5-1

16-2  
16-5  
1-10  
T3-7

M-3  
O-7

O-8  
O-9  
O-10  
O-11  
O-12  
O-13  
O-14  
O-15  
O-16  
O-17  
O-18  
O-19  
O-20  
O-21  
O-22  
O-23  
O-24  
O-25  
O-26  
O-27  
O-28  
O-29  
O-30  
O-31  
O-32  
O-33  
O-34  
O-35  
O-36  
O-37  
O-38  
O-39  
O-40  
O-41  
O-42  
O-43  
O-44  
O-45  
O-46  
O-47  
O-48  
O-49  
O-50  
O-51  
O-52  
O-53  
O-54  
O-55  
O-56  
O-57  
O-58  
O-59  
O-60  
O-61  
O-62  
O-63  
O-64  
O-65  
O-66  
O-67  
O-68  
O-69  
O-70  
O-71  
O-72  
O-73  
O-74  
O-75  
O-76  
O-77  
O-78  
O-79  
O-80  
O-81  
O-82  
O-83  
O-84  
O-85  
O-86  
O-87  
O-88  
O-89  
O-90  
O-91  
O-92  
O-93  
O-94  
O-95  
O-96  
O-97  
O-98  
O-99  
O-100
