# Supplementary material for: Landscape genomic prediction for restoration of a Eucalyptus foundation species under climate change
Source: eLife journal article supplement (doi:10.7554/elife.31835), 2018-04-23
Supplement: supp [file elife-31835-supp-v1.zip › elife_poa_e31835_Supplementary_file_1.csv]

Supplementary file 1: E. melliodora sampling information
						# in final		expected	experiment
site name	latitude	longitude	# sampled	# failed	# outliers*	analysis	# alleles	heterozygosity	chamber	drought
1	-33.42	149.55	10	2	1 secondary	7	10443	0.036
2	-36.68	146.26	10	3		7	10434	0.0351
3	-27.37	152.03	10	1		9	10417	0.0452
5	-33.71	149.52	10	0	1 primary	9	10698	0.0377
7	-33.94	116.96	7	0	7 geographic	0	-	-
10	-37.29	143.78	10	2		8	10644	0.0369
11	-35.4	149.13	10	1		9	10777	0.0389	yes	yes
13	-37	145.47	6	3		3	9738	0.0743
14	-32.39	150.88	10	0		10	10690	0.0368
16	-33.22	149.28	7	2	3 secondary	2	8480	0.1518
17	-33.44	147.52	10	2		8	10628	0.0381
19	-37.18	144.48	10	1		9	10599	0.0346
20	-34.91	148.97	10	1		9	10905	0.0399
21	-37.14	142.84	10	1		9	10778	0.0374
24	-36.98	144.05	10	3		7	10434	0.0394
26	-35.39	149.68	10	1	7 primary	2	8777	0.1239
A	-36.39	146.48	10	0		10	10765	0.037
B	-35.24	149.16	10	3		7	10539	0.0384	yes	yes
C	-35.03	147.33	9	2	1 secondary	6	10340	0.0412
D	-36.37	145.7	10	1		9	10847	0.0387	yes	yes
G	-36.86	148.85	10	1		9	10585	0.0373	yes	yes
H	-36.64	149.57	10	3		7	10364	0.039
i1	-36.75	145.58	10	2		8	10512	0.0351
i2	-36.54	146.11	10	3		7	10591	0.0374
J2	-33.12	149.06	10	1		9	10801	0.038
K2	-30.54	151.79	10	2		8	10608	0.0359
M	-34.63	149.87	3	2	1 primary	0	-	-
N1	-34.04	148.57	10	0		10	10966	0.0396
N2	-33.62	149.64	10	3		7	10468	0.0364
O	-37.43	147.89	10	0	10 primary	0	-	-
P	-35.82	145.31	10	1		9	10753	0.0375
T1	-35.26	147.31	10	3		7	10380	0.0356	yes
T2	-35.38	147.25	10	1		9	10927	0.0384
T3	-35.3	147.17	10	0		10	10723	0.0364	yes	yes
U	-36.63	144.35	10	2		8	10672	0.0381
V	-33.42	149.75	10	3		7	10515	0.0388
W1	-36.43	144.41	10	2		8	10432	0.0393
W2	-36.58	143.52	10	6		4	9878	0.0585
W3	-36.98	144.05	10	2		8	10424	0.0382
* primary outliers refers to outlier samples identified with the first PCA analysis
secondary outliers refers to outlier samples identified with the second PCA analysis
geographic outliers refers to samples outside the natural distribution
