# Supplementary material for: Landscape genomic prediction for restoration of a Eucalyptus foundation species under climate change
Source: eLife journal article supplement (doi:10.7554/elife.31835), 2018-04-23
Supplement: supp [file elife-31835-supp-v1.zip › elife_poa_e31835_Supplementary_file_2.csv]

Supplementary file 2: Pairwise Fst
	10	11	13	14	16	17	19	2	20	21	24	26	3	5	A	B	C	D	G	H	i1	i2	J2	K2	N1	N2	P	T1	T2	T3	U	V	W1	W2	W3
1	0.043	0.027	0.037	0.034	-0.005	0.036	0.034	0.046	0.01	0.023	0.035	0.028	0.053	0.019	0.037	0.029	0.047	0.011	0.032	0.038	0.018	0.012	0.016	0.021	0.008	0.044	0.014	0.026	0.011	0.027	0.028	0.013	0.031	0.027	0.022
10		0.047	0.047	0.065	0.019	0.056	0.03	0.034	0.028	0.018	0.047	0.03	0.097	0.043	0.038	0.049	0.058	0.028	0.056	0.072	0.029	0.022	0.039	0.039	0.041	0.053	0.045	0.042	0.028	0.034	0.028	0.046	0.063	0.027	0.042
11			0.049	0.054	0.028	0.04	0.057	0.051	0.028	0.034	0.05	0.041	0.08	0.035	0.045	0.03	0.051	0.029	0.064	0.055	0.037	0.027	0.031	0.026	0.027	0.053	0.035	0.041	0.021	0.039	0.04	0.034	0.056	0.027	0.046
13				0.056	0.011	0.05	0.053	0.045	0.031	0.022	0.051	0.015	0.103	0.047	0.046	0.035	0.043	0.026	0.057	0.067	0.035	0.025	0.045	0.056	0.037	0.065	0.039	0.069	0.033	0.036	0.022	0.048	0.063	0.006	0.054
14					0.016	0.028	0.055	0.073	0.033	0.046	0.062	0.044	0.057	0.047	0.055	0.049	0.053	0.031	0.061	0.043	0.041	0.039	0.025	0.017	0.035	0.053	0.029	0.049	0.022	0.039	0.042	0.047	0.051	0.036	0.048
16						0.029	0.028	0.051	-0.002	0.009	0.016	0.047	0.053	0.008	0.041	0.01	0.025	-0.008	0.04	0.044	0.034	-0.004	0	0.03	0.004	0.021	0.003	0.034	0	0.009	-0.005	-0.004	0.042	0.02	0.034
17							0.055	0.063	0.038	0.04	0.056	0.037	0.062	0.043	0.048	0.043	0.041	0.02	0.068	0.05	0.031	0.035	0.023	0.019	0.033	0.05	0.022	0.031	0.018	0.04	0.029	0.031	0.057	0.031	0.042
19								0.036	0.034	0.028	0.043	0.063	0.097	0.047	0.042	0.043	0.062	0.021	0.065	0.071	0.026	0.023	0.04	0.045	0.043	0.057	0.036	0.05	0.029	0.036	0.027	0.042	0.063	0.043	0.055
2									0.024	0.025	0.048	0.071	0.097	0.04	0.032	0.049	0.061	0.024	0.053	0.073	0.033	0.031	0.034	0.047	0.044	0.067	0.052	0.051	0.031	0.026	0.027	0.054	0.068	0.051	0.048
20										0.022	0.037	0.007	0.067	0.021	0.033	0.018	0.035	0.014	0.05	0.045	0.02	0.021	0.013	0.015	0.021	0.029	0.019	0.033	0.012	0.023	0.021	0.022	0.039	0.02	0.034
21											0.032	0.028	0.079	0.024	0.028	0.03	0.041	0.018	0.045	0.055	0.013	0.026	0.022	0.032	0.019	0.044	0.021	0.029	0.016	0.025	0.013	0.026	0.044	0.023	0.024
24												0.059	0.097	0.054	0.045	0.045	0.066	0.036	0.065	0.078	0.046	0.038	0.04	0.044	0.043	0.058	0.045	0.056	0.038	0.045	0.046	0.039	0.073	0.043	0.053
26													0.067	0.027	0.059	0.027	0.047	0.01	0.044	0.057	0.036	0.008	0.009	0.022	0.022	0.049	0.008	0.054	0.013	0.034	0.026	0.026	0.053	0.029	0.048
3														0.07	0.093	0.066	0.097	0.068	0.092	0.061	0.086	0.073	0.06	0.039	0.063	0.097	0.056	0.079	0.064	0.07	0.077	0.058	0.093	0.062	0.079
5															0.049	0.029	0.045	0.019	0.057	0.053	0.029	0.036	0.022	0.027	0.03	0.026	0.028	0.032	0.016	0.034	0.028	0.035	0.047	0.028	0.042
A																0.046	0.053	0.026	0.063	0.068	0.031	0.04	0.032	0.039	0.036	0.054	0.03	0.039	0.027	0.025	0.032	0.042	0.057	0.034	0.05
B																	0.04	0.021	0.058	0.052	0.027	0.029	0.028	0.045	0.024	0.039	0.036	0.039	0.021	0.027	0.019	0.02	0.057	0.022	0.046
C																		0.034	0.074	0.055	0.041	0.036	0.04	0.048	0.04	0.047	0.036	0.052	0.026	0.037	0.039	0.042	0.052	0.037	0.057
D																			0.048	0.038	0.014	0.011	0.012	0.007	0.023	0.036	0.011	0.017	0.008	0.013	0.009	0.019	0.033	0.012	0.022
G																				0.062	0.057	0.005	0.042	0.049	0.051	0.068	0.045	0.064	0.038	0.049	0.044	0.056	0.072	0.056	0.059
H																					0.051	0.052	0.031	0.025	0.048	0.076	0.049	0.052	0.037	0.056	0.034	0.052	0.07	0.05	0.058
i1																						0.019	0.017	0.032	0.026	0.049	0.024	0.032	0.011	0.03	0.008	0.029	0.054	0.033	0.035
i2																							0.029	0.027	0.032	0.037	0.023	0.024	0.013	0.029	0.016	0.019	0.048	0.011	0.034
J2																								0.015	0.018	0.03	0.006	0.027	0.016	0.021	0.022	0.022	0.035	0.021	0.029
K2																									0.02	0.033	0.013	0.025	0.008	0.032	0.037	0.022	0.052	0.017	0.024
N1																										0.032	0.016	0.027	0.01	0.026	0.024	0.023	0.043	0.019	0.031
N2																											0.039	0.062	0.027	0.04	0.033	0.04	0.058	0.042	0.061
P																												0.025	0.01	0.021	0.011	0.023	0.035	0.022	0.017
T1																													0.009	0.033	0.021	0.037	0.048	0.039	0.053
T2																														0.014	0.016	0.021	0.029	0	0.019
T3																															0.019	0.033	0.047	0.016	0.033
U																																0.022	0.038	0.009	0.034
V																																	0.056	0.022	0.043
W1																																		0.044	0.071
W2																																			0.036
