# Supplementary material for: Landscape genomic prediction for restoration of a Eucalyptus foundation species under climate change
Source: eLife journal article supplement (doi:10.7554/elife.31835), 2018-04-23
Supplement: supp [file elife-31835-supp-v1.zip › elife_poa_e31835_Supplementary_file_3.csv]

'Supplementary file 3: Pearson''s correlation between environmental variables across sampling sites'
																						surface	depth	surface	depth	surface	depth	Prescott
	% explained	bioclim1	bioclim2	bioclim3	bioclim4	bioclim5	bioclim6	bioclim7	bioclim8	bioclim9	bioclim10	bioclim11	bioclim12	bioclim13	bioclim14	bioclim15	bioclim16	bioclim17	bioclim18	bioclim19	elevation	water	water	nitrogen	nitrogen	phosphorus	phosphorus	Index	MrVBF
bioclim1	9.86	1	0.32	-0.1	0.34	0.84	0.79	0.32	0.29	0.45	0.95	0.95	-0.46	-0.25	-0.59	0.21	-0.25	-0.53	-0.15	-0.45	-0.71	-0.33	-0.47	-0.24	-0.15	0.5	0.47	-0.5	0.64
bioclim2	2.87		1	0	0.61	0.43	-0.26	0.8	0.37	-0.17	0.44	0.1	-0.22	-0.24	0.14	-0.44	-0.31	0.2	0.17	-0.56	0.1	-0.15	-0.22	-0.49	-0.53	0.1	0.01	-0.29	0.22
bioclim3	22.42			1	-0.76	-0.55	-0.12	-0.59	0.52	-0.56	-0.36	0.11	0.39	0.6	0.22	0.47	0.53	0.11	0.69	-0.26	0.35	0.54	0.57	0.06	-0.01	0.14	0.29	0.2	-0.39
bioclim4	12.17				1	0.72	-0.03	0.95	-0.1	0.31	0.62	0.03	-0.38	-0.55	-0.07	-0.61	-0.54	0.08	-0.34	-0.16	-0.19	-0.47	-0.58	-0.35	-0.35	0.03	-0.13	-0.31	0.48
bioclim5	3.49					1	0.64	0.67	-0.05	0.66	0.95	0.67	-0.65	-0.6	-0.56	-0.16	-0.58	-0.47	-0.52	-0.29	-0.74	-0.6	-0.68	-0.31	-0.19	0.26	0.15	-0.57	0.71
bioclim6	2.45						1	-0.14	-0.08	0.69	0.67	0.88	-0.47	-0.23	-0.77	0.47	-0.2	-0.76	-0.43	-0.07	-0.87	-0.34	-0.37	0.03	0.19	0.34	0.35	-0.41	0.52
bioclim7	10.82							1	0.01	0.18	0.58	0.02	-0.39	-0.54	0.01	-0.65	-0.55	0.13	-0.25	-0.3	-0.12	-0.44	-0.52	-0.42	-0.43	0.02	-0.14	-0.34	0.42
bioclim8	10.61								1	-0.64	0.17	0.29	0.08	0.27	0.02	0.11	0.16	0.05	0.6	-0.65	0.23	0.38	0.26	-0.33	-0.38	0.2	0.28	-0.14	0.13
bioclim9	1.51									1	0.52	0.43	-0.46	-0.44	-0.52	0.1	-0.35	-0.51	-0.7	0.26	-0.74	-0.61	-0.58	0.12	0.24	0.11	0.05	-0.29	0.37
bioclim10	3.89										1	0.8	-0.54	-0.43	-0.54	-0.03	-0.42	-0.44	-0.29	-0.41	-0.69	-0.47	-0.6	-0.31	-0.23	0.42	0.33	-0.54	0.71
bioclim11	17.3											1	-0.4	-0.12	-0.64	0.43	-0.12	-0.63	-0.11	-0.39	-0.74	-0.24	-0.33	-0.12	-0.01	0.5	0.51	-0.45	0.54
bioclim12	13.04												1	0.88	0.76	0.24	0.9	0.76	0.75	0.56	0.64	0.51	0.43	0.61	0.44	0.22	0.29	0.91	-0.64
bioclim13	18.37													1	0.46	0.61	0.98	0.44	0.8	0.37	0.54	0.56	0.47	0.55	0.41	0.29	0.42	0.79	-0.59
bioclim14	0														1	-0.36	0.45	0.97	0.6	0.34	0.72	0.35	0.35	0.29	0.13	-0.05	-0.07	0.65	-0.52
bioclim15	11.46															1	0.61	-0.42	0.24	0.16	-0.11	0.22	0.19	0.34	0.36	0.25	0.4	0.24	-0.19
bioclim16	22.31																1	0.44	0.76	0.45	0.49	0.52	0.42	0.6	0.45	0.36	0.47	0.82	-0.58
bioclim17	0																	1	0.59	0.35	0.71	0.34	0.3	0.29	0.12	0.04	0.01	0.66	-0.46
bioclim18	18.87																		1	-0.1	0.68	0.62	0.5	0.13	-0.05	0.31	0.42	0.51	-0.43
bioclim19	2.97																			1	0.09	0.02	0.06	0.76	0.75	-0.04	-0.04	0.72	-0.41
elevation	0.24																				1	0.63	0.61	-0.01	-0.17	-0.24	-0.12	0.48	-0.57
surface water	17.03																					1	0.91	0.1	0.06	0.12	0.28	0.31	-0.24
depth water	3.56																						1	0.1	0.1	-0.13	0.06	0.27	-0.37
surface nitrogren	6.05																							1	0.94	0.32	0.3	0.78	-0.38
depth nitrogen	8.56																								1	0.25	0.22	0.63	-0.23
surface phosphorus	24.23																									1	0.93	0.19	0.22
depth phosphorus	24.27																										1	0.18	0.14
Prescott Index	4.88																											1	-0.65
MrVBF	2.72																												1
