# Supplementary material for: Landscape genomic prediction for restoration of a Eucalyptus foundation species under climate change
Source: eLife journal article supplement (doi:10.7554/elife.31835), 2018-04-23
Supplement: supp [file elife-31835-supp-v1.zip › elife_poa_e31835_Supplementary_file_4.csv]

Supplementary file 4: Percent of variation explained and p-values for non-interaction linear models for chamber experiment
	seedling height		total leaf length		relative height increment
	% explained	p-value	% explained	p-value	% explained	p-value
sampling site	17.7	<0.00001	8.2	0.00063	1.8	<0.00001
maternal line:sampling site	10.6	0.00031	17.2	0.00001	27.6	<0.00001
experimental condition	5.4	0.00032	1.2	0.05084	8.1	<0.00001
germination chamber	0	--	0.3	--	0.8	--
block	1.1	--	1.6	--	5.1	--
residual	65.2	--	71.5	--	56.6	--
