# Supplementary material for: Landscape genomic prediction for restoration of a Eucalyptus foundation species under climate change
Source: eLife journal article supplement (doi:10.7554/elife.31835), 2018-04-23
Supplement: supp [file elife-31835-supp-v1.zip › elife_poa_e31835_Supplementary_file_5.csv]

Supplementary file 5: P-values of interaction term in linear model for chamber experiment
	response variable
	seedling height	total leaf length	relative height increment
maternal line	0.89	0.58	0.67
sampling site	0.63	0.51	0.53
