# Supplementary material for: Landscape genomic prediction for restoration of a Eucalyptus foundation species under climate change
Source: eLife journal article supplement (doi:10.7554/elife.31835), 2018-04-23
Supplement: supp [file elife-31835-supp-v1.zip › elife_poa_e31835_Supplementary_file_6.csv]

Supplementary file 6: Percent of variation explained and p-values for non-interaction linear models for drought experiment
	stomatal conductance		leaf length to width ratio		SPAD		SLA
	% explained	p-value	% explained	p-value	% explained	p-value	% explained	p-value
sampling site	0.9	0.02859	20	0.00007	19.5	0.0001	6.7	0.00864
maternal line:sampling site	5.8	0.00088	21.2	0.00131	10.2	0.03344	7.9	0.07407
experimental condition	62.3	<0.00001	0	0.49232	0	0.54236	4.4	0.02135
sample pairing	0	--	15.8	--	8.7	--	4.9	--
block	7.6	--	2.5	--	2.2	--	6.1	--
residual	23.4	--	40.5	--	59.4	--	70	--
