# Supplementary material for: Landscape genomic prediction for restoration of a Eucalyptus foundation species under climate change
Source: eLife journal article supplement (doi:10.7554/elife.31835), 2018-04-23
Supplement: supp [file elife-31835-supp-v1.zip › elife_poa_e31835_Supplementary_file_7.csv]

Supplementary file 7: P-values of interaction term in linear model for drought experiment
	response variable
	stomatal conductance	leaf length to width ratio	SPAD	SLA
maternal line	0.13	0.47	0.56	0.27
sampling site	0.51	0.78	0.31	0.82
