# Supplementary material for: Landscape genomic prediction for restoration of a Eucalyptus foundation species under climate change
Source: eLife journal article supplement (doi:10.7554/elife.31835), 2018-04-23
Supplement: supp [file elife-31835-supp-v1.zip › elife_poa_e31835_Supplementary_file_8.csv]

Supplementary file 8: Qst-Fst results
phenotypic trait	experimental conditions	Qst-Fst (95% CI)	Qst-Fst	(95 % CI)	Qst-Fst Lower Bound crit. value.2.5%	Qst-Fst Upper bound crit. value.97.5%	two-tailed p-value	Qst (95% CI)	Estimated Qst	Qst Lower Bound CI.2.5%	Qst Upper bound CI.97.5%	Fst (95% CI)
seedling height	warm chamber	0.24 (-0.77,0.76)	0.24	(-0.77,0.76)	-0.77	0.76	0.14	0.28 (-2.90,3.07)	0.28	-2.9	3.07	0.039 (0.035,0.042)
	hot chamber	0.33 (-0.86,0.76)	0.33	(-0.86,0.76)	-0.86	0.76	0.11	0.37 (-2.85,3.84)	0.37	-2.85	3.84
total leaf length	warm chamber	0.26 (-0.83,0.73)	0.26	(-0.83,0.73)	-0.83	0.73	0.12	0.30 (-2.65,2.83)	0.3	-2.65	2.83
	hot chamber	0.05 (-0.27,0.55)	0.05	(-0.27,0.55)	-0.27	0.55	0.51	0.09 (-0.23,0.78)	0.09	-0.23	0.78
relative height increment	warm chamber	-0.04 (-0.05,0.12)	-0.04	(-0.05,0.12)	-0.05	0.12	0.32	0.00 (-0.02,0.05)	0	-0.02	0.05
	hot chamber	-0.03 (-0.06,0.14)	-0.03	(-0.06,0.14)	-0.06	0.14	0.52	0.01 (-0.02,0.10)	0.01	-0.02	0.1
stomatal conductance	outdoor water	0.05 (-0.88,0.87)	0.05	(-0.88,0.87)	-0.88	0.87	0.31	0.09 (-0.82,0.81)	0.09	-0.82	0.81	0.038 (0.034,0.042)
	outdoor drought	0.05 (-0.92,0.72)	0.05	(-0.92,0.72)	-0.92	0.72	0.31	0.09 (-0.83,0.91)	0.09	-0.83	0.91
leaf length to width ratio	outdoor water	0.05 (-0.07,0.24)	0.05	(-0.07,0.24)	-0.07	0.24	0.46	0.09 (-0.03,0.40)	0.09	-0.03	0.4
	outdoor drought	0.05 (-0.07,0.25)	0.05	(-0.07,0.25)	-0.07	0.25	0.47	0.09 (-0.03,0.41)	0.09	-0.03	0.41
SPAD	outdoor water	0.11 (-0.11,0.47)	0.11	(-0.11,0.47)	-0.11	0.47	0.3	0.15 (-0.04,0.97)	0.15	-0.04	0.97
	outdoor drought	0.11 (-0.11,0.52)	0.11	(-0.11,0.52)	-0.11	0.52	0.31	0.15 (-0.04,0.89)	0.15	-0.04	0.89
SLA	outdoor water	0.06 (-0.70,0.82)	0.06	(-0.70,0.82)	-0.7	0.82	0.47	0.10 (-1.02,1.35)	0.1	-1.02	1.35
	outdoor drought	0.06 (-0.72,0.75)	0.06	(-0.72,0.75)	-0.72	0.75	0.46	0.10 (-0.89,1.41)	0.1	-0.89	1.41
