# Supplementary figures and images for: Landscape genomic prediction for restoration of a Eucalyptus foundation species under climate change
Source: eLife journal article supplement (doi:10.7554/elife.31835), 2018-04-23

PCoA axis 2 ( 11.4 %)

0.03  
0.02  
0.01  
0.00  
-0.01  
-0.02

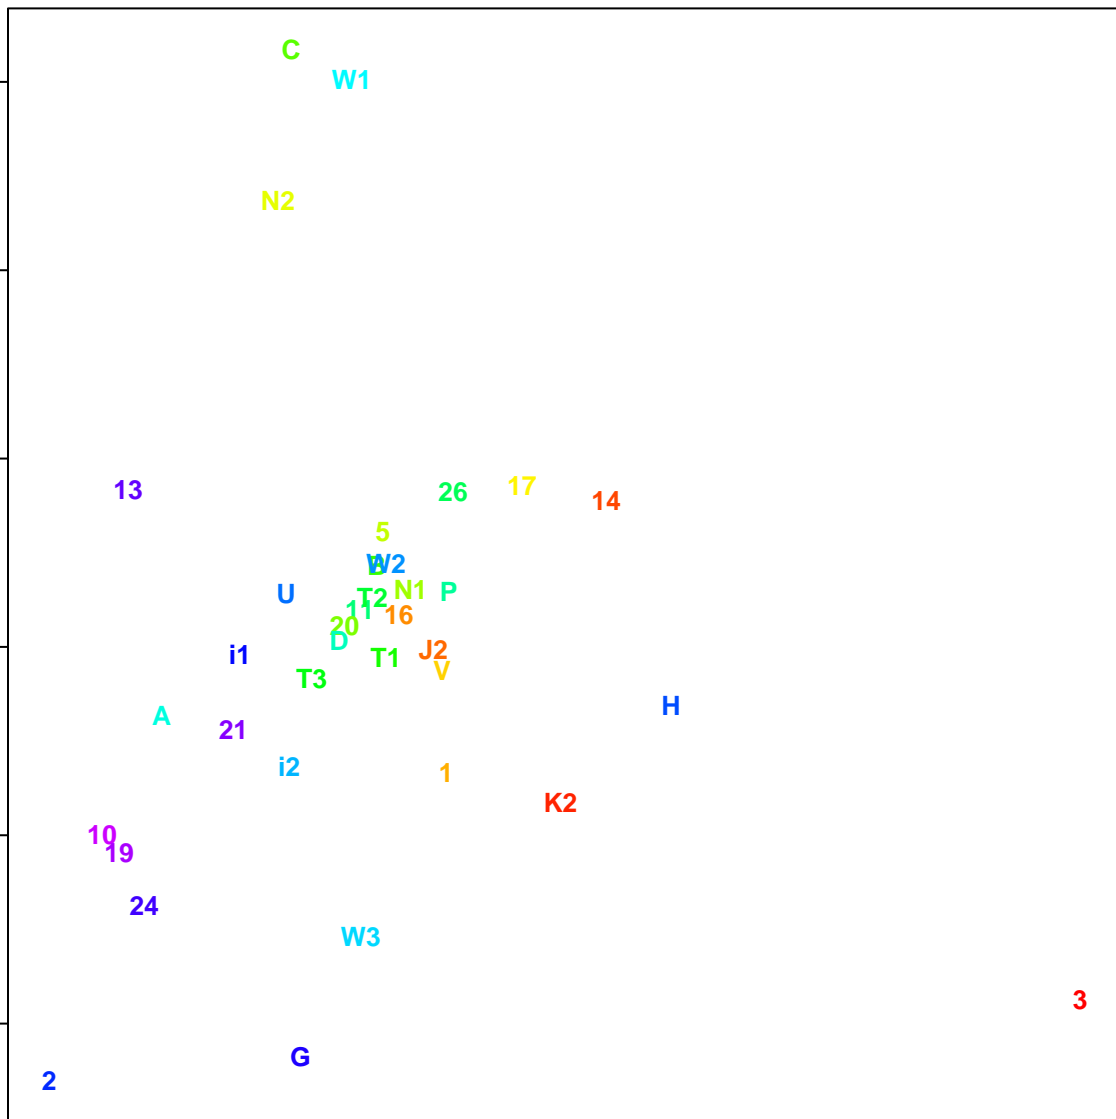

PCoA axis 1 ( 25.7 %)

Supplement: supp [file elife-31835-supp-v1.zip › elife_poa_e31835_Figure_1_figure_supplement_4.pdf]

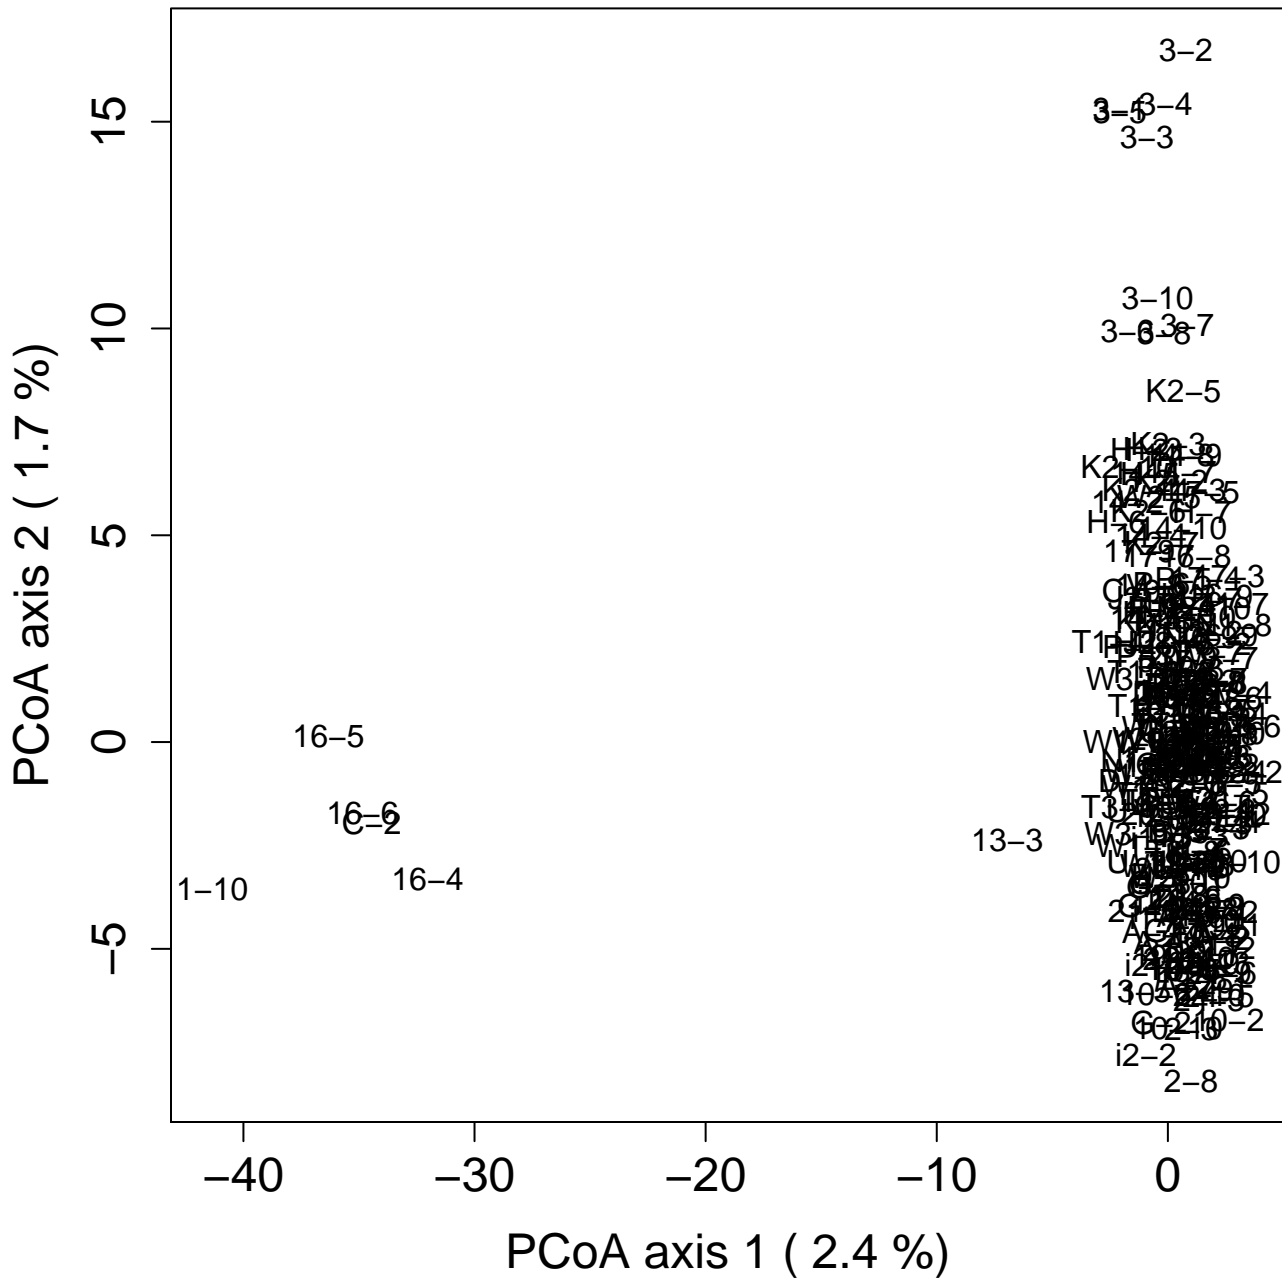

Supplement: supp [file elife-31835-supp-v1.zip › elife_poa_e31835_Figure_1_figure_supplement_3.pdf]

Cluster Dendrogram

Height

250

200

150

100

50

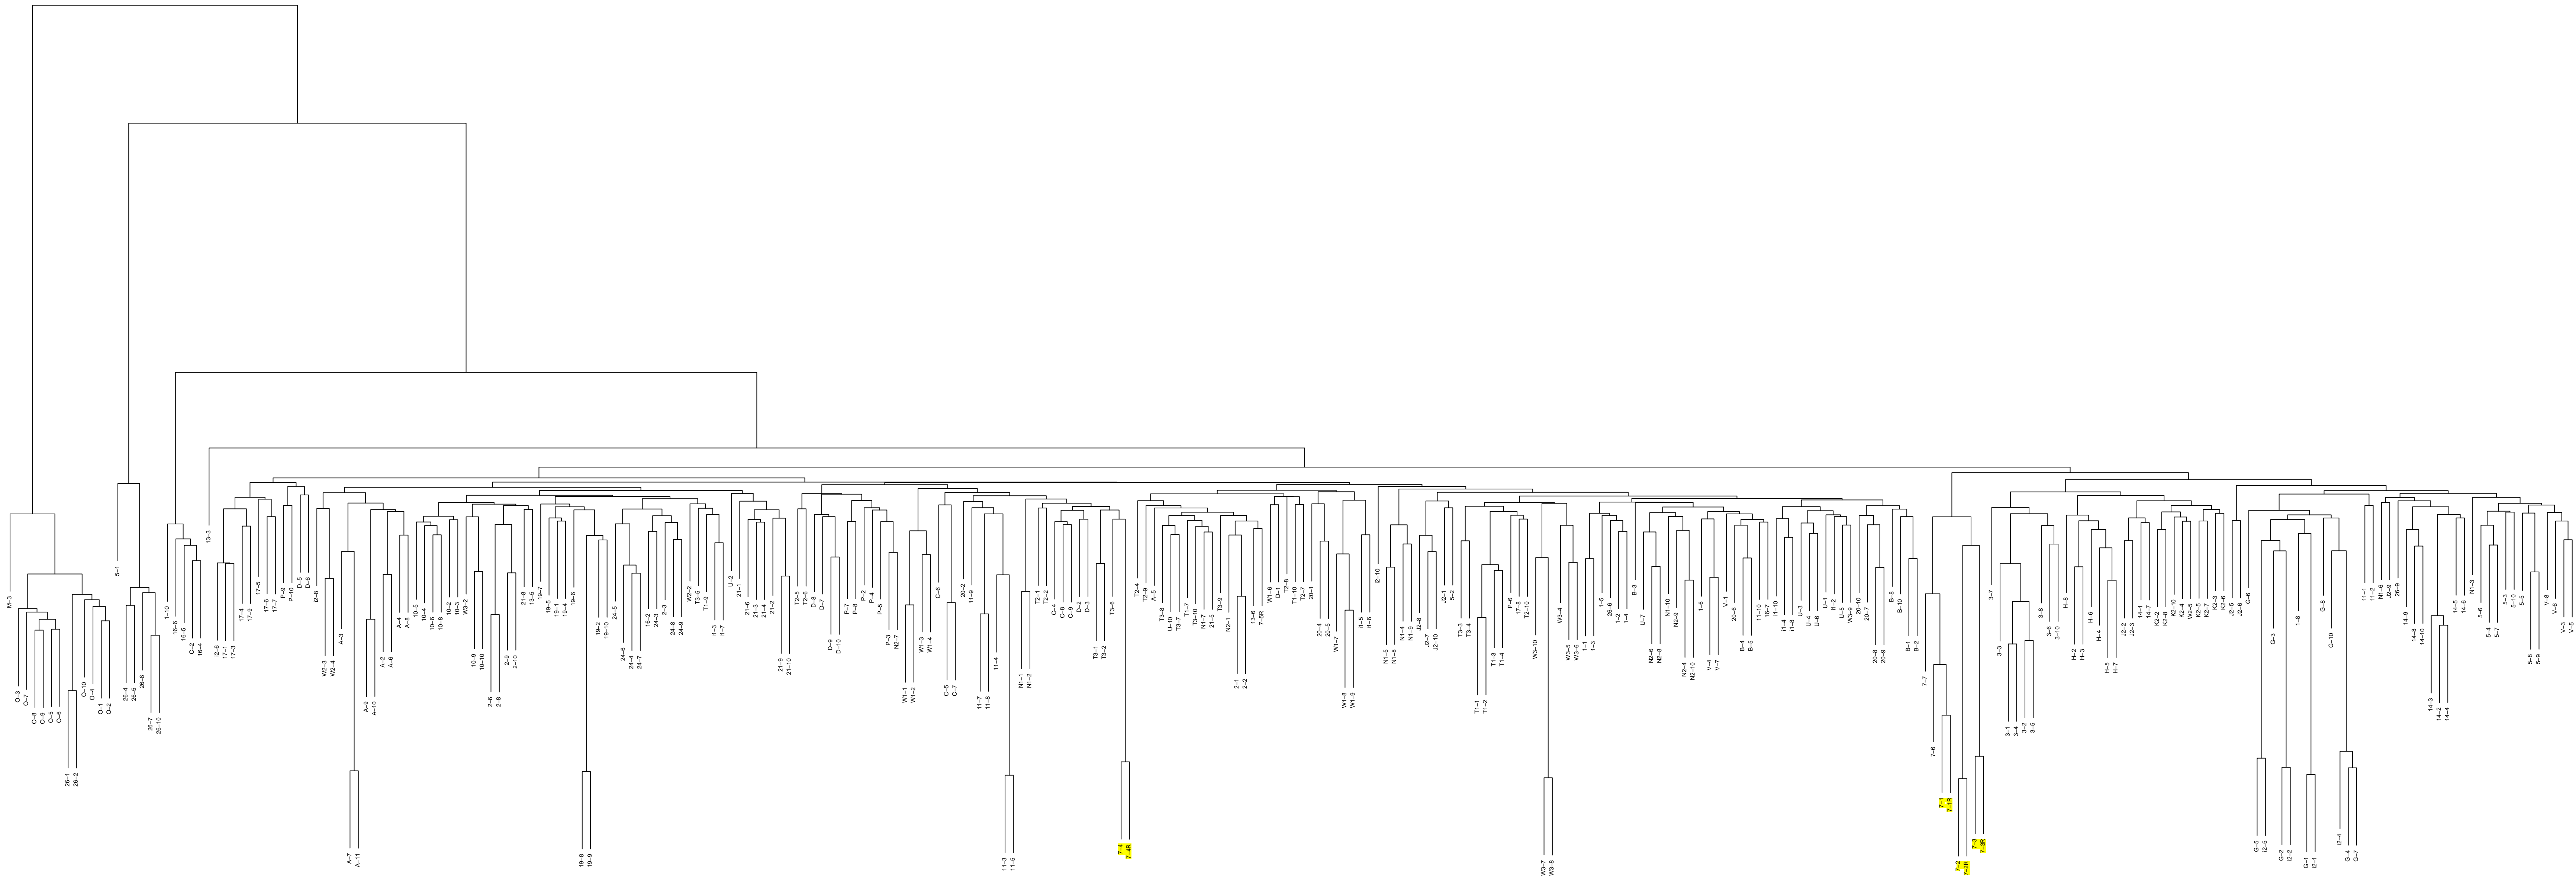

genomic distance  
hclust ("complete")

Supplement: supp [file elife-31835-supp-v1.zip › elife_poa_e31835_Figure_1_figure_supplement_1.pdf]
